# Supplementary material for: Microplastic-Induced Oxidative Stress in Metolachlor-Degrading Filamentous Fungus Trichoderma harzianum
Source: MDPI journal article supplement (doi:10.3390/ijms232112978), 2022-10-26
Supplement: s1 [file s1]

**Table S1.** Content of the molecular species of phospholipids determined in the *T. harzianum* cells after 24, 48, 72, 96, and 120 hours of cultivation with MPs (2 g L<sup>-1</sup>), MET (50 mg L<sup>-1</sup>), MPs, and MET mixture, or without the tested pollutants (control).

| Phospholipid species | Time [h] |       |       |       |       |       |       |       |       |       |       |       |       |       |       |       |       |       |       |       |
|----------------------|----------|-------|-------|-------|-------|-------|-------|-------|-------|-------|-------|-------|-------|-------|-------|-------|-------|-------|-------|-------|
|                      | 24       |       |       |       | 48    |       |       |       | 72    |       |       |       | 96    |       |       |       | 120   |       |       |       |
|                      | C        | MP    | MET   | MIX   | C     | MP    | MET   | MIX   | C     | MP    | MET   | MIX   | C     | MP    | MET   | MIX   | C     | MP    | MET   | MIX   |
| PA 16;0 18;2         | 1,89     | 2,52  | 2,21  | 1,39  | 1,48  | 2,29  | 1,95  | 0,67  | 0,34  | 0,32  | 0,26  | 1,33  | 0,13  | 0,44  | 0,09  | 0,27  | 0,25  | 0,12  | 0,05  | 0,04  |
| PC 16;0 18;2         | 4,74     | 2,14  | 2,93  | 1,27  | 1,80  | 1,49  | 1,35  | 0,61  | 2,55  | 1,79  | 1,83  | 1,31  | 3,32  | 1,88  | 1,93  | 1,96  | 2,70  | 2,09  | 2,74  | 1,82  |
| PC 16;0 18;1         | 2,20     | 1,74  | 0,81  | 0,62  | 0,88  | 0,59  | 0,25  | 0,27  | 0,93  | 0,67  | 0,51  | 0,62  | 1,40  | 0,73  | 0,21  | 0,67  | 0,89  | 0,28  | 0,43  | 0,25  |
| PC 18;2 18;2         | 23,27    | 14,21 | 25,73 | 17,10 | 20,61 | 8,48  | 12,48 | 10,19 | 19,08 | 21,31 | 16,59 | 17,86 | 32,13 | 30,76 | 50,18 | 21,33 | 52,22 | 49,40 | 50,69 | 54,95 |
| PC 18;2 18;1         | 9,41     | 6,38  | 9,80  | 6,75  | 6,56  | 2,97  | 3,87  | 3,72  | 6,21  | 4,44  | 4,92  | 5,24  | 9,03  | 6,69  | 8,30  | 6,36  | 7,34  | 8,00  | 8,58  | 8,37  |
| PC 18;1 18;1         | 3,31     | 2,40  | 3,80  | 3,41  | 2,01  | 1,74  | 1,16  | 0,66  | 1,62  | 1,62  | 1,72  | 1,62  | 2,21  | 2,27  | 1,91  | 2,22  | 1,13  | 1,25  | 1,19  | 1,04  |
| PC 18;0 18;1         | 1,38     | 0,38  | 0,42  | 0,30  | 0,40  | 0,62  | 0,05  | 0,05  | 0,09  | 0,07  | 0,07  | 0,04  | 0,32  | 0,13  | 0,03  | 0,09  | 0,10  | 0,05  | 0,03  | 0,02  |
| PE 16;0 18;2         | 29,92    | 40,14 | 29,36 | 36,54 | 38,24 | 40,65 | 43,83 | 44,36 | 41,27 | 39,30 | 42,86 | 44,87 | 31,76 | 32,23 | 18,94 | 39,70 | 20,88 | 20,69 | 20,21 | 16,89 |
| PE 16;0 18;1         | 4,83     | 5,41  | 6,15  | 6,66  | 8,49  | 9,91  | 7,93  | 9,02  | 8,31  | 7,72  | 8,46  | 6,57  | 4,46  | 4,55  | 2,17  | 6,60  | 1,89  | 2,10  | 1,29  | 1,43  |
| PE 18;2 18;2         | 7,53     | 8,82  | 6,17  | 10,90 | 7,45  | 8,73  | 8,85  | 9,84  | 8,11  | 10,07 | 8,32  | 9,33  | 6,38  | 8,84  | 9,08  | 8,73  | 7,91  | 7,73  | 8,43  | 8,99  |
| PE 18;2 18;1         | 2,00     | 2,96  | 2,50  | 3,77  | 3,08  | 4,85  | 4,26  | 4,76  | 3,28  | 4,31  | 4,77  | 3,55  | 2,41  | 3,43  | 2,63  | 3,84  | 1,44  | 2,13  | 1,84  | 1,70  |
| PE 18;1 18;1         | 1,62     | 2,80  | 1,80  | 3,55  | 1,72  | 3,48  | 2,17  | 4,83  | 2,30  | 2,68  | 2,38  | 2,51  | 1,53  | 2,42  | 0,89  | 2,69  | 0,59  | 1,14  | 0,49  | 0,60  |
| PE 18;2 18;0         | 1,96     | 1,99  | 1,07  | 1,53  | 1,70  | 2,26  | 2,46  | 0,84  | 1,31  | 1,29  | 1,27  | 0,82  | 1,42  | 1,11  | 0,43  | 1,42  | 0,36  | 1,04  | 0,63  | 0,22  |
| PE 18;1 18;0         | 0,47     | 0,33  | 0,26  | 0,23  | 0,48  | 0,58  | 0,18  | 0,19  | 0,25  | 0,19  | 0,10  | 0,15  | 0,11  | 0,06  | 0,01  | 0,06  | 0,07  | 0,04  | 0,01  | 0,02  |
| PI 16;0 18;2         | 1,72     | 2,63  | 2,36  | 2,38  | 1,41  | 4,46  | 3,39  | 3,81  | 1,07  | 1,56  | 1,66  | 1,31  | 1,32  | 1,67  | 1,74  | 1,31  | 1,17  | 1,87  | 2,04  | 2,07  |
| PI 16;0 18;1         | 1,16     | 1,41  | 1,47  | 1,02  | 0,86  | 2,26  | 2,03  | 1,90  | 0,80  | 0,67  | 1,17  | 0,55  | 0,68  | 1,07  | 0,48  | 0,69  | 0,33  | 0,64  | 0,45  | 0,48  |
| PI 18;2 18;2         | 0,23     | 0,60  | 0,33  | 0,29  | 0,20  | 0,30  | 0,47  | 0,46  | 0,14  | 0,11  | 0,20  | 0,18  | 0,14  | 0,21  | 0,11  | 0,13  | 0,13  | 0,13  | 0,26  | 0,19  |
| PI 18;1 18;2         | 0,74     | 0,94  | 0,54  | 0,67  | 0,64  | 1,15  | 0,48  | 0,78  | 0,36  | 0,29  | 0,71  | 0,47  | 0,35  | 0,41  | 0,09  | 0,43  | 0,13  | 0,31  | 0,13  | 0,23  |
| PI 18;1 18;1         | 0,25     | 0,38  | 0,34  | 0,17  | 0,22  | 0,21  | 0,46  | 0,47  | 0,17  | 0,13  | 0,14  | 0,22  | 0,12  | 0,10  | 0,05  | 0,16  | 0,01  | 0,06  | 0,01  | 0,04  |
| PI 18;0 18;2         | 0,14     | 0,45  | 0,29  | 0,23  | 0,19  | 0,21  | 0,25  | 0,38  | 0,19  | 0,12  | 0,21  | 0,33  | 0,10  | 0,09  | 0,26  | 0,29  | 0,06  | 0,39  | 0,16  | 0,15  |
| PI 18;0 18;1         | 0,12     | 0,13  | 0,16  | 0,14  | 0,12  | 0,17  | 0,13  | 0,27  | 0,09  | 0,05  | 0,12  | 0,12  | 0,03  | 0,03  | 0,01  | 0,05  | 0,01  | 0,02  | 0,00  | 0,00  |
| PS 16;0 18;2         | 0,23     | 0,52  | 0,45  | 0,15  | 0,58  | 0,55  | 0,61  | 0,57  | 0,46  | 0,29  | 0,34  | 0,25  | 0,18  | 0,30  | 0,13  | 0,24  | 0,10  | 0,10  | 0,06  | 0,17  |
| PS 16;0 18;1         | 0,38     | 0,50  | 0,71  | 0,52  | 0,65  | 1,51  | 1,03  | 0,98  | 0,58  | 0,63  | 0,67  | 0,45  | 0,25  | 0,33  | 0,11  | 0,30  | 0,12  | 0,10  | 0,05  | 0,13  |
| PS 18;2 18;2         | 0,49     | 0,23  | 0,35  | 0,41  | 0,23  | 0,53  | 0,31  | 0,36  | 0,48  | 0,38  | 0,72  | 0,30  | 0,20  | 0,26  | 0,20  | 0,45  | 0,18  | 0,30  | 0,23  | 0,20  |
